# Supplementary material
Source: publisher site journal article supplement (https://www.dovepress.com/article/533289)
Supplement: Supplementary file 1 [file 533289%20%252509Supplementary%20Figure.doc]

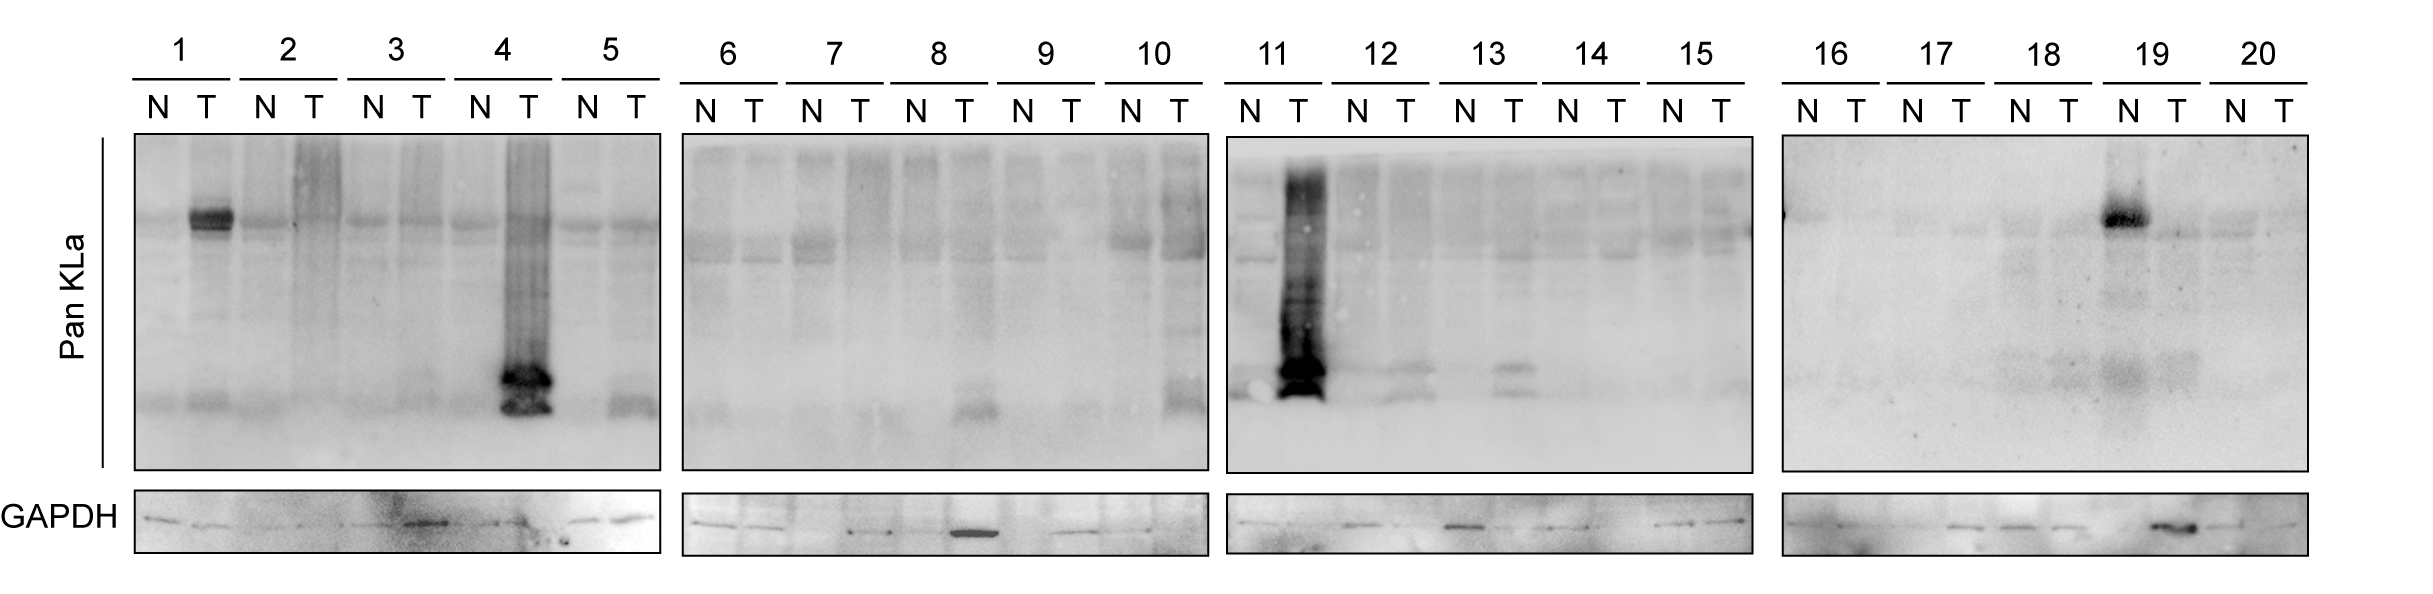


**Supplemental Figure 1** The western blot analysis of lactylation levels in adjacent non-cancerous tissues (N) and cancerous tissues (T) from twenty LUAD patients at Fuyang People's Hospital.
